# Supplementary material
Source: PubMed Central journal article supplement (PMC4682307)
Supplement: supp_tpc.15.00750_TPC2015-00750-RAR1_Supplemental_Material.pdf [file supp_tpc.15.00750_TPC2015-00750-RAR1_Supplemental_Material.pdf]

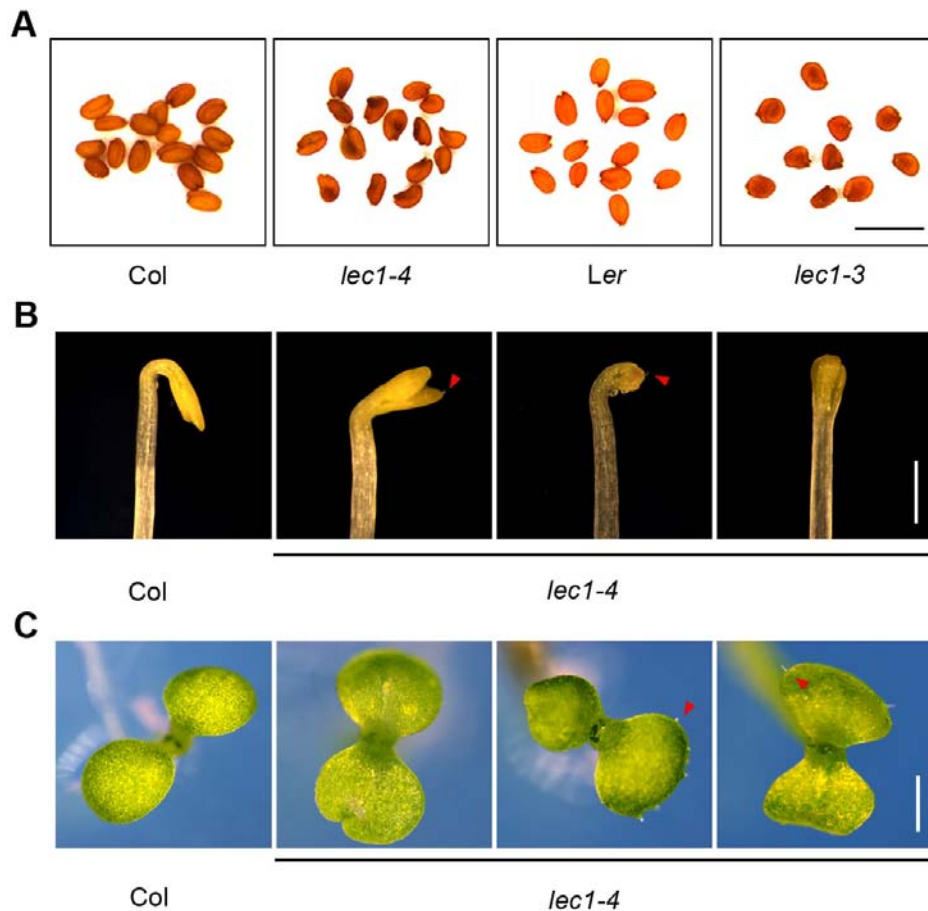

1  
2  
3  
4  
5  
6  
7  
8  
9  
10  
11

**Supplemental Figure 1. Characterization of the *lec1-4* Mutant.**

**(A)** The *lec1* mutants exhibit mature seeds with abnormal morphologic characters in comparison to the wild type. Bar=1 mm.

**(B)** Dark-grown *lec1-4* mutant exhibits abnormal apical hook formation. Red arrowheads indicate trichomes. Bar=1 mm.

**(C)** The *lec1-4* mutant develops a varying degree of trichomes on cotyledons in comparison to the wild type. 5-day-old seedlings grown in the light were used for investigation. Red arrowheads indicate trichomes. Bar=1 mm.

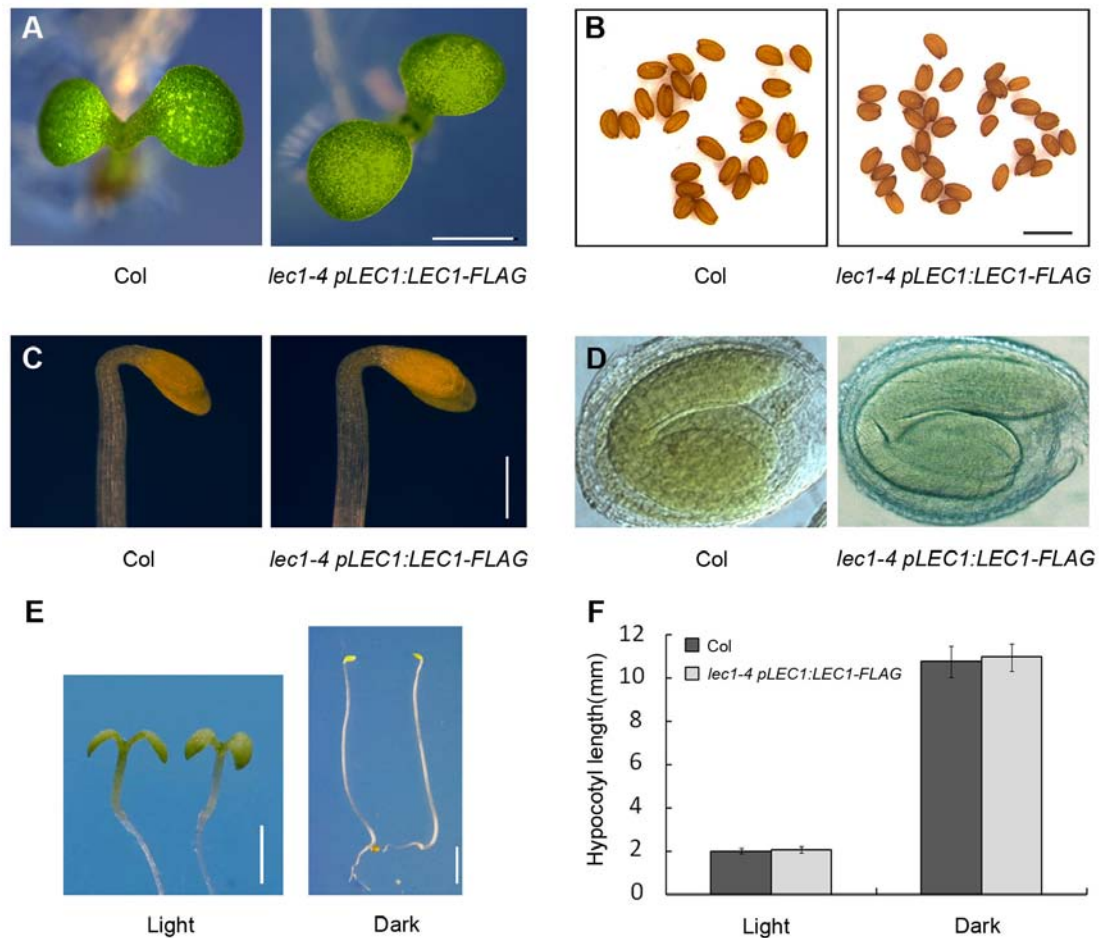

12

13

14

**Supplemental Figure 2. *pLEC1:LEC1-FLAG* Complements Growth Defects of *lec1-4*.**

15

**(A)** *lec1-4 pLEC1:LEC1-FLAG* exhibits normal cotyledon. Bar=1 mm.

16

**(B)** *lec1-4 pLEC1:LEC1-FLAG* exhibits normal mature seeds. Bar=1 mm.

17

**(C)** Dark-grown *lec1-4 pLEC1:LEC1-FLAG* exhibits normal apical hook. Bar=1 mm.

18

19

**(D)** *lec1-4 pLEC1:LEC1-FLAG* exhibits normal embryo development.

20

**(E)** *lec1-4 pLEC1:LEC1-FLAG* has similar hypocotyl length with the wild type in both light and dark condition. Bar=2 mm.

21

22

**(F)** Hypocotyl length statistics of the wild type and *lec1-4 pLEC1:LEC1-FLAG* seedlings shown in **(E)**. Data represent mean  $\pm$ SD of at least 30 seedlings.

23

24

25

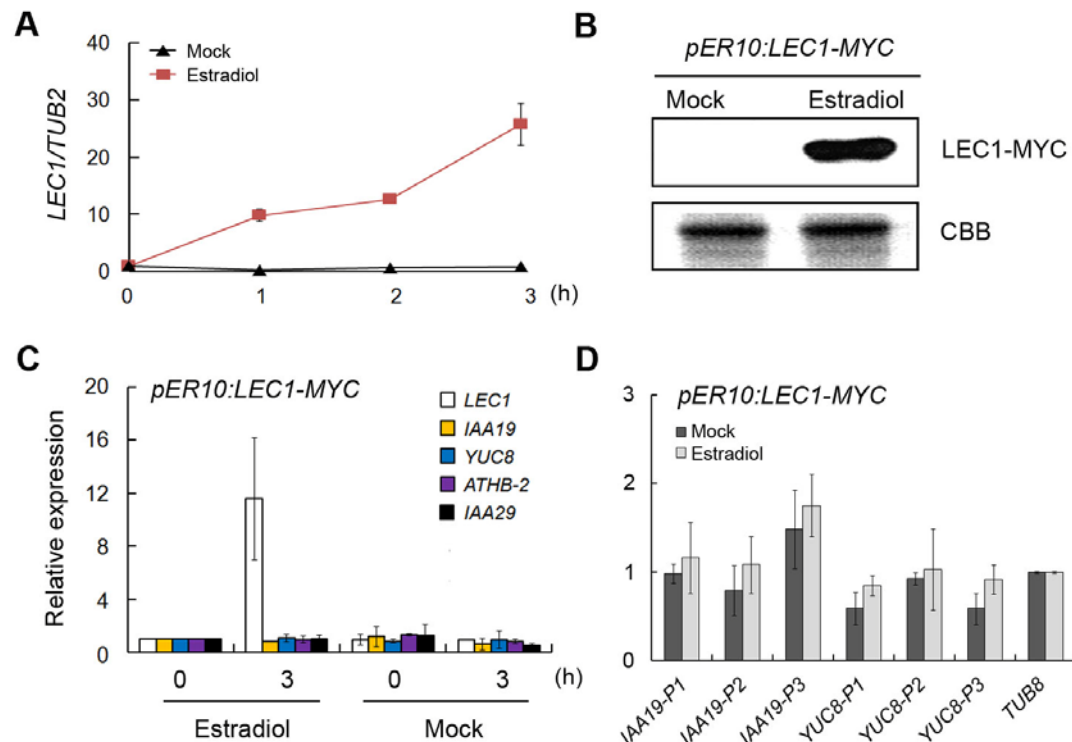

26

27

28 **Supplemental Figure 3.** Characterization of *pER10:LEC1-MYC* Transgenic  
29 Line.

30 **(A)** Quantitative RT-PCR analysis of *LEC1* expression in *pER10:LEC1-MYC*.  
31 3-day-old *pER10:LEC1-MYC* seedlings were treated with 10  $\mu$ M estradiol or  
32 mock-treated for the indicated times and harvested for RNA extraction.  
33 Relative gene expression was calculated by comparing to the values at 0 h.

34 **(B)** Immunoblot analysis of estradiol-induced LEC1-MYC protein. 3-day-old  
35 *pER10:LEC1-MYC* seedlings were treated with 10  $\mu$ M estradiol or  
36 mock-treated for 2 days and harvested for detection of LEC1-MYC using  
37 anti-MYC antibody.

38 **(C)** Overexpression of *LEC1* has no effect on the expression of downstream  
39 genes in the light. 3-day-old *pER10:LEC1-MYC* seedlings were treated with 10  
40  $\mu$ M estradiol or mock-treated for 3 h in the light.

41 **(D)** ChIP analysis of LEC1-MYC binding in *IAA19* and *YUC8* genes in the light.  
42 3-day-old *pER10:LEC1-MYC* seedlings were treated with 10  $\mu$ M estradiol or  
43 mock-treated and kept in continuous light for an additional two days and  
44 harvested for ChIP assay. Data represent mean  $\pm$ SD of triplicates. Asterisks  
45 indicate significant changes in ChIP-enrichment fold in estradiol-treated  
46 sample compared with mock-treated sample ( $p < 0.05$ , by Student's *t*-test).

47

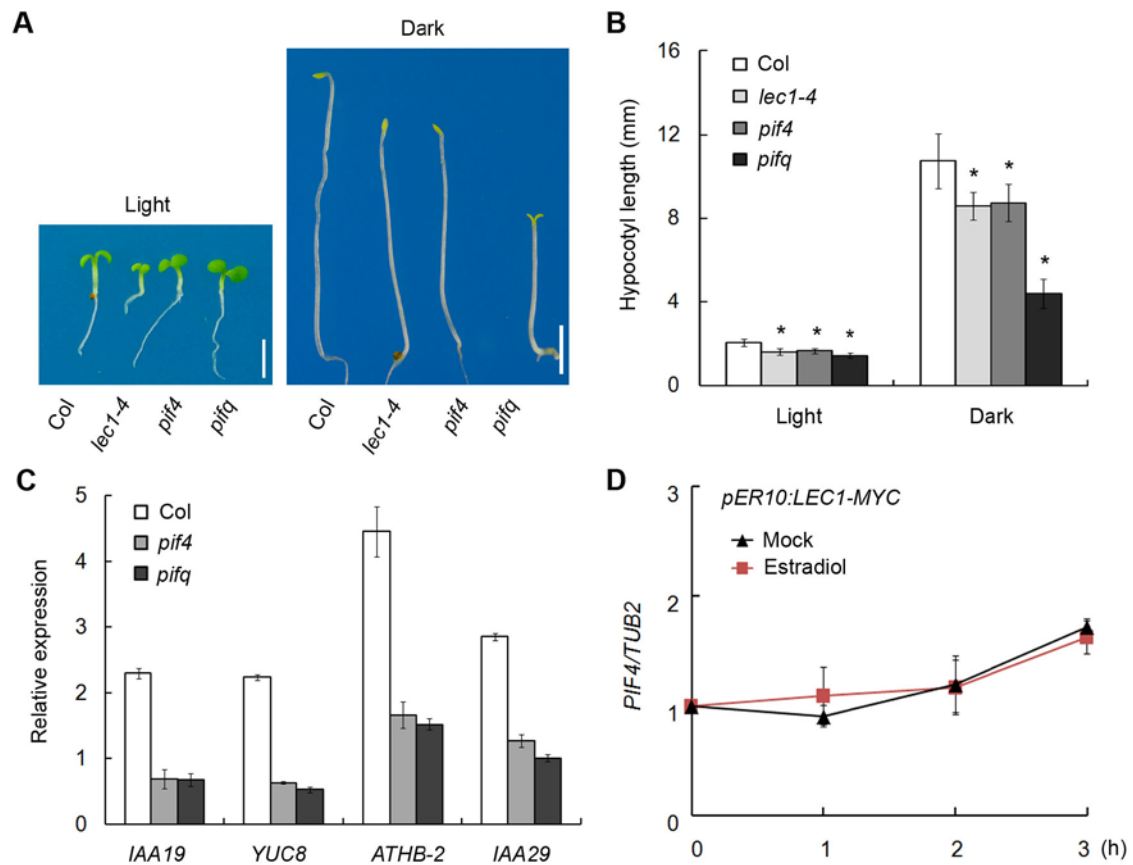

48  
49

**Supplemental Figure 4.** Hypocotyl Length and Gene Expression Analysis in *lec1-4*, *pif4*, *pifq*, and *pER10:LEC1-MYC* Transgenic Plants.

50  
51  
52 **(A)** Hypocotyl lengths of 5-day-old Col wild type, *lec1-4*, *pif4*, and *pifq*  
53 seedlings grown in the light or the dark. *pifq*, *pif1 pif3 pif4 pif5* quadruple  
54 mutant. Bar=2 mm.

55 **(B)** Hypocotyl length statistics of the wild-type, *lec1-4*, *pif4*, and *pifq* seedlings  
56 shown in **(A)**. Data represent mean  $\pm$ SD of at least 30 seedlings. Asterisks  
57 indicate significant differences of mutants compared with the wild type ( $p <$   
58 0.05, by Student's *t*-test).

59 **(C)** Expression of hypocotyl elongation-related genes was impaired in *pif4* and  
60 *pifq* mutants. 3-day-old seedlings in the light were transferred to darkness for 6  
61 h and harvested for RNA extraction. Relative gene expression levels were  
62 normalized against the expression of *TUB2*.

63 **(D)** Overexpression of *LEC1* has no effect on *PIF4* expression. 3-day-old  
64 *pER10:LEC1-MYC* seedling were treated with 10  $\mu$ M estradiol or mock-treated  
65 and immediately transferred to darkness for the indicated time. The relative  
66 gene expression was calculated by comparing the values at different time  
67 points to that at 0 h.

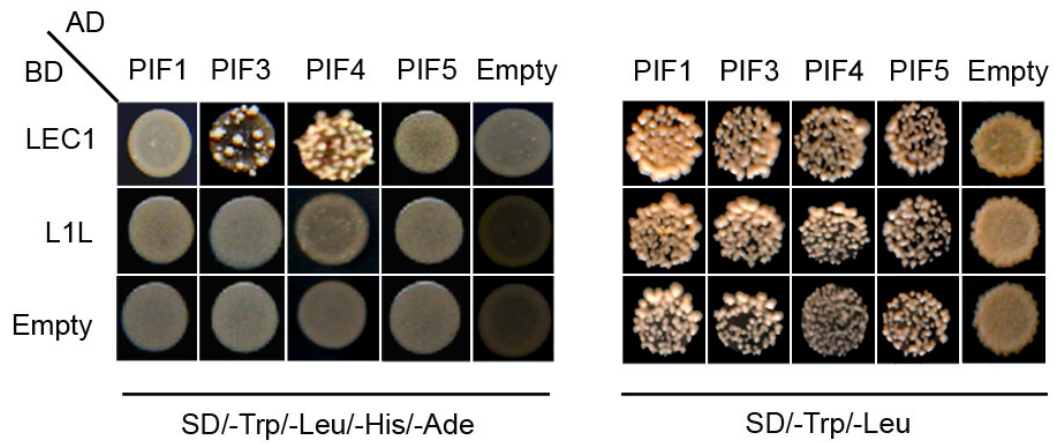

68

69

70 **Supplemental Figure 5.** Yeast Two-Hybrid Assays Showing the Interactions  
71 between LEC1, L1L, and PIFs. Transformed yeast cells were grown on  
72 SD/-Trp/-Leu/-His/-Ade and SD/-Trp/-Leu medium.

73

74

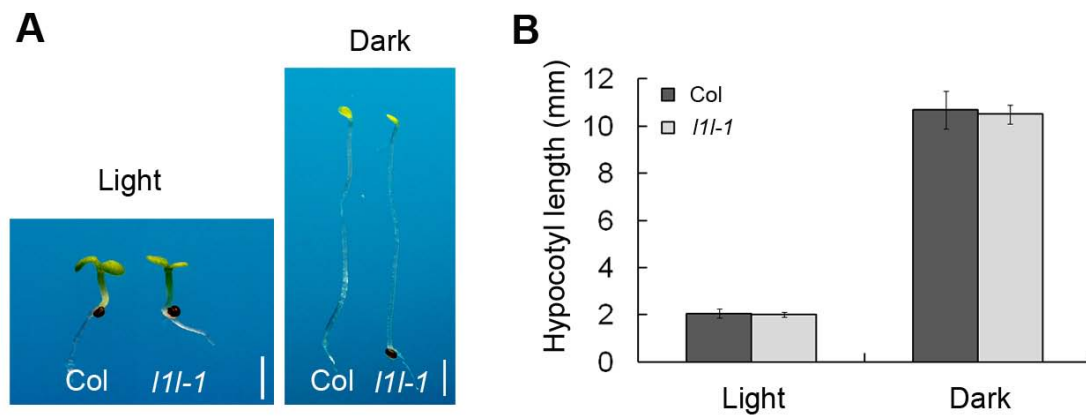

75

76

77 **Supplemental Figure 6.** Hypocotyl Phenotype of the *I1I-1* Mutant.

78 **(A)** 5-day-old *I1I-1* seedlings grown in the light or darkness show similar  
79 hypocotyl length with the wild type. Bar=2 mm.

80 **(B)** Hypocotyl length statistics of the wild type and *I1I-1* mutant shown in **(A)**.

81 Data represent mean  $\pm$ SD of at least 30 seedlings.

82

83

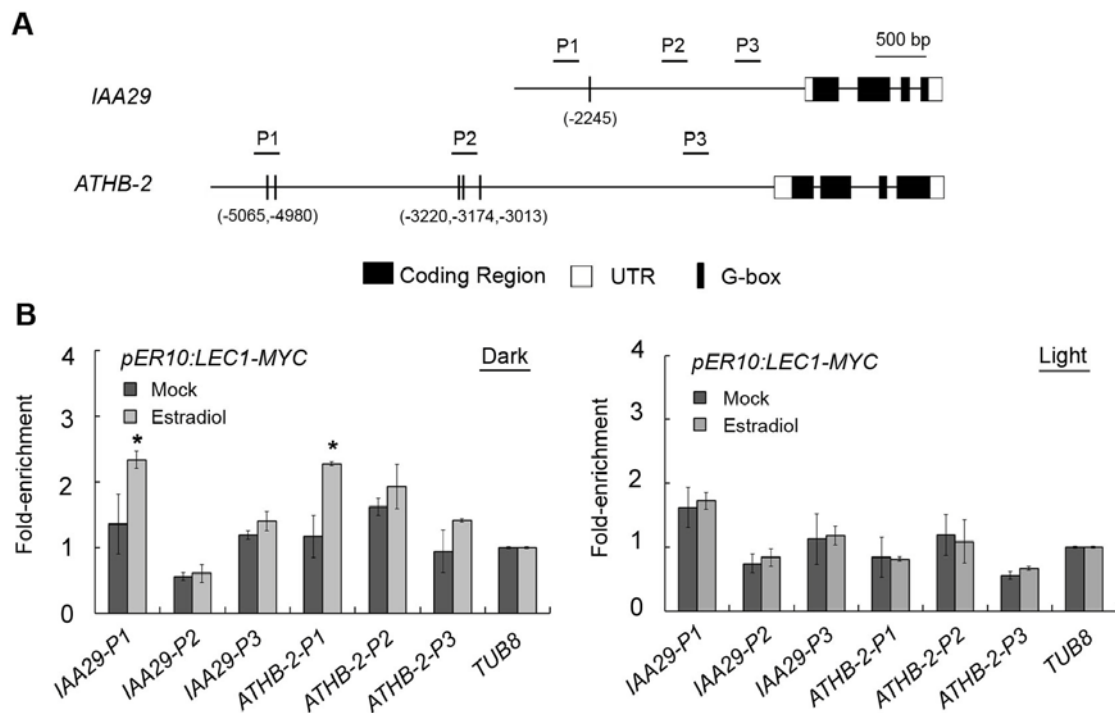

84

85

86 **Supplemental Figure 7.** ChIP Analysis of LEC1-MYC Binding in *IAA29* and  
87 *ATHB-2* Genes in the Dark and Light.

88 **(A)** Schematic diagram of *IAA29* and *ATHB-2* genomic regions. P1 to P3  
89 indicate fragments for ChIP-quantitative PCR amplification. Numbers indicate  
90 the positions of G-box elements in *IAA29* and *ATHB-2* promoters relative to  
91 ATG.

92 **(B)** ChIP analysis of LEC1-MYC binding to the G-box containing region in  
93 *IAA29* and *ATHB-2* genes upon precipitation with anti-MYC antibody. 3-day-old  
94 of *pER10:LEC1-MYC* seedlings were treated with 10 $\mu$ M estradiol or mock and  
95 immediately transferred to darkness or continuous light for additional two days  
96 and harvested for ChIP assay. Data represent mean  $\pm$ SD of triplicates.

97 Asterisks indicate significant changes in ChIP-enrichment fold in  
98 estradiol-treated sample compared with mock-treated sample ( $p < 0.05$ , by  
99 Student's *t*-test).

100

## A

Biotinylated probe:

gaagacttagatatcaaatgactc**CACGTG**tcgatattggattggttttcattgg

Cold competitor:

gaagacttagatatcaaatgactc**CACGg**Gtcgatattggattggttttcattgg

## B

*IAA19* gene promoter region (1958bp)

ATCAAACTCGAGTAGAAGCACATGAAATTTCTGGATATTAATAATAATAATCAAATAGCCTTATATTGCTGTCAGGAAATAATTCTATTTAG  
ACTACCTGAATTTCCAGTTGAACGGCGTTTTCCAAATGCAAGCATCATATATTGCTCATCGTATCATTAGTCATAATAAACTATGGACCAATT  
TCATGGTGAAAAGGGGCTTCGGATGAAATTTTGATCAAATTATTTGTTTATTGATAAAACAACGTTTTTTAAAGGATGACAGTTGTGCGT  
TTGAGATGAAAACCAAACACTGCTCCCACTCAAATTTGTAATAATGGAATTTATAAATATTTGGTGCTACAAATGTCGTTTGGTAGCCTTTGGAAA  
CATTAAAGGTAACATAGAGATATGGGAGTATGGAACCTAATCTCTTTATGTGGTTGATTTTCATATAAATTT**CACGTG**GCCCAACTGTTTCTGTCAATC  
CATTGATCAAAGTTGGTAGACAAGAGTGAACCCACACACTCACACACATACACACGTCGATCTTTTTTCTATTCTCGTGTCCCTACGTCCTCTA  
AACCCATCATTATCTTGTGTTTTATTGGTATGCTGAGCTAGAGATGTTAAACAACACCAACAATGCGGGTCTGGCTTAGTTTGAACCTATT  
CGAAACTAGTTATACTCCGCTTGAAGTCATTGGTTTCGAGACTAACTTTGGAGATGAGTATCATAAACAGCTCTAACTTAAGATTACAATACCTCT  
TGTTAGTCTAAGTTGAGAGGTGTTGCCATTGACTATATTTCTTTGGAAATTTGGTTTACCAGGATGTTGCAAGAAGATTAAATAGTTATAAAT  
AGTACAAATCAATCCATATGATATGATATTCAAAAACAAAAAATAAATAAATGATCTAAAAGTCGAACCAATCTAATTTGATTAGAGCATG  
TATATAATTTGAATCCCTAAGTAAATCAACCAATACTTGAGAAGGTAGTTATTTCTTATAAATTTGATGATGATTTGATTAATAACTCAACCTGAA  
CCCAAAACATACTAGAATATACGTTTTTACTTTGTAATTTGTCACATTCAAAACTAACTCGGTACTATATTTGATTCTGATCCATACAAATTTTG  
TATATCTGGTTTTATTTCCATGTGAGATTAAGCGGTGACCAATCAAATCATTGCTGGAATATCTTACTATTAAGCTAAATGTTGTTAGTTATATAC  
AAGCAATCCAAAAAATGATGCAAAGAGAGATAAACGAACATATCCAAAAATGGTAGGATTTGATTTAATATCCCATCTCTTATTAGAAATGC  
AAACAAATAGACTATAGTTTTTATTTTATTTTCACTATAAATAACTAAATAACATGAACCTATTGAAGAAAAAGTATACTATAGTTGTGATTCTGTG  
ATATACTAGTTAGAACAAGAATCTTTACAAAAAATAACACATGGGATGTTAGGAGAAAGGAGATTCCGATTCCAATGATCCAACGGTCAGAGAAA  
AATCAGAAGAAAATTTACAACCGTAGGATCTGTTCCCTAACCACTTGTAATGCCGGTCTTTATTAATTTGAGAAAAAATAAAAAACAGCACA  
AACTTATGTCTCTCATGTGACCGACCGCATCTCAGTTGACCTGTCTGCCCCACTTTGTCTCCCAACAACTGAATAACAAGAAGAAGA  
AGACTTTAGATATCAAATGACT**CACGTG**TCGATATTGGATTGGTTTTTCATTGGTTGATCGTGTGGACCAACGAAGCAACATATAAAAAAGCACGAC  
GCGGTGCCATTACTACAATAAGAGAAGGTAGGAGAAGAAAGTTCTCATTTCAATTTGATCAAATTTGAGAGGAAAAAAGAAAGTTCAAGAA

*mplIAA19:GUS*: **CACGTG** → **CACGgG**

101

102

103

**Supplemental Figure 8.** Mutated Versions of the *IAA19* Sequence Used in EMSA and Transient Expression Assays.

104

**(A)** Biotinylated probe and cold competitor used in EMSA assay. Red lower case indicates mutated base from T to G.

105

106

107

**(B)** *IAA19* promoter sequence and its mutated version in *pIAA19:GUS* and *mplIAA19:GUS* used in transient expression assay, respectively. For *mplIAA19:GUS*, two G-box elements in *IAA19* promoter were mutated to CACGgG.

108

109

110

111



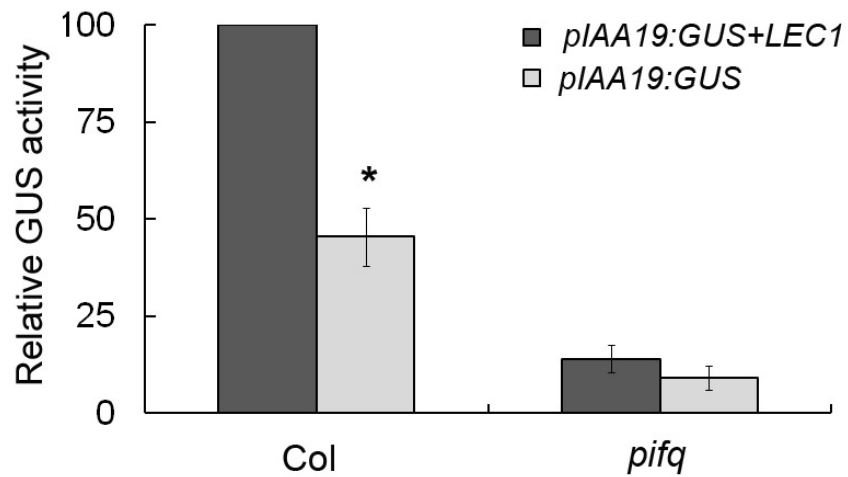

112

113

114 **Supplemental Figure 9.** Transient Expression Assays of *IAA19*

115 Transcriptional Activity Modulated by LEC1. *Arabidopsis* mesophyll protoplasts

116 were isolated from wild type or *pifq* mutant. *LEC1*, *35S:LEC1-EYFP<sup>C</sup>*. Values

117 are mean  $\pm$ SD of three biological replicates.

118

119

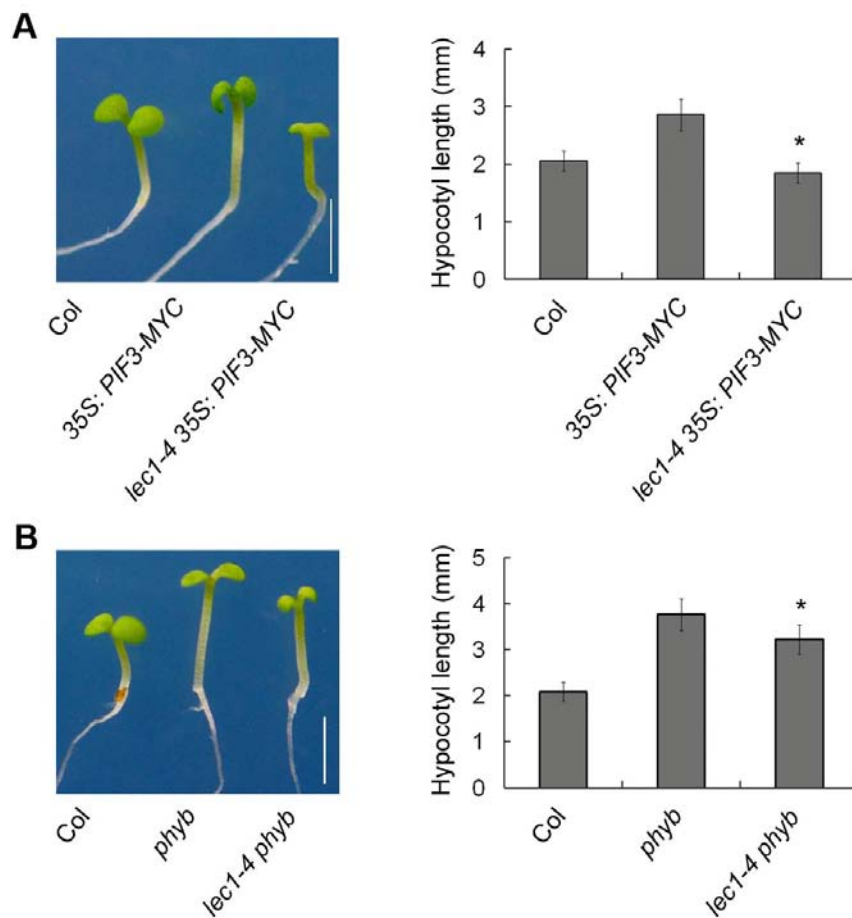

120

121

122 **Supplemental Figure 10.** *lec1-4* Suppresses the Long Hypocotyl Phenotype  
 123 of *35S:PIF3-MYC* and *phyb*.

124 **(A)** Hypocotyl photograph (left) and length statistics (right) of 5-day-old  
 125 light-grown wild-type, *35S:PIF3-MYC*, and *lec1-4 35S:PIF3-MYC* seedlings.  
 126 Data represent mean  $\pm$ SD of at least 30 seedlings. Asterisks indicate  
 127 significant difference of hypocotyl length of *lec1-4 35S:PIF3-MYC* compared  
 128 with *35S:PIF3-MYC* ( $p < 0.05$ , by Student's *t*-test). Bar=2 mm.

129 **(B)** Hypocotyl photograph (left) and length statistics (right) of 5-day-old  
 130 light-grown wild type, *phyb* and *lec1-4 phyb* seedlings. Data represent mean  
 131  $\pm$ SD of at least 30 seedlings. Asterisks indicate significant difference of  
 132 hypocotyl length of *lec1-4 phyb* compared with *phyb* ( $p < 0.05$ , by Student's  
 133 *t*-test). Bar=2 mm.

134 □

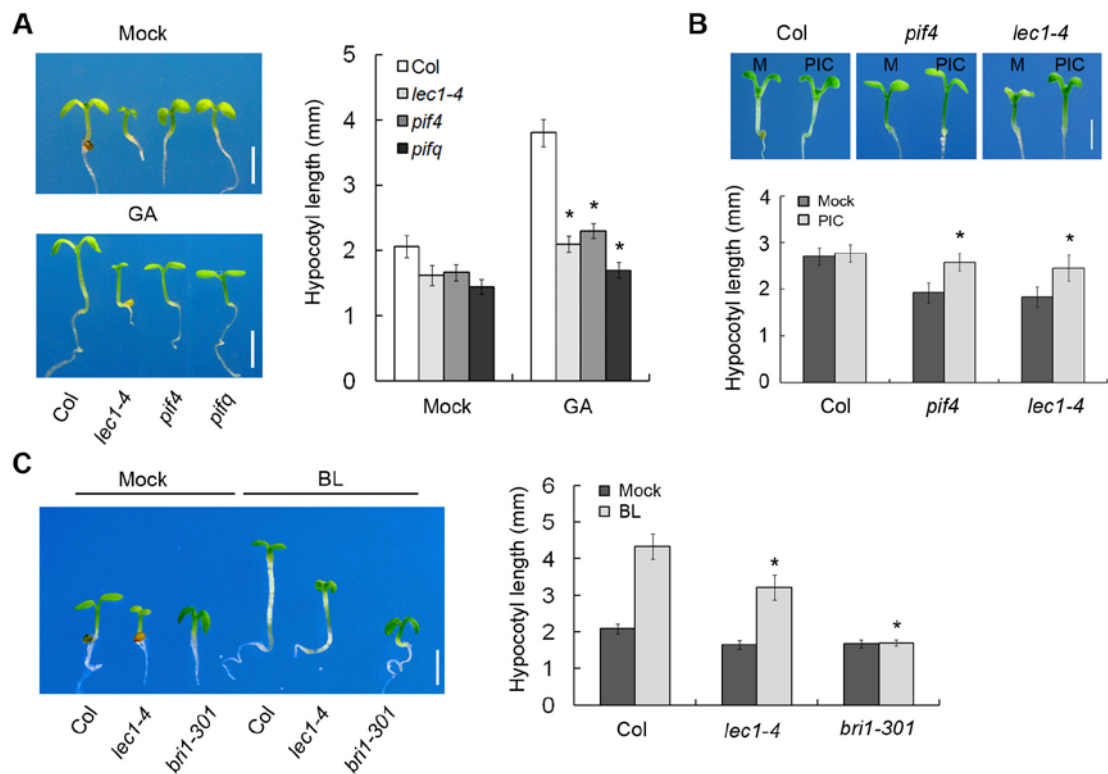

135

136

137 **Supplemental Figure 11.** Effects of GA, Auxin and BR on Hypocotyl  
 138 Elongation of *lec1-4* and *pif4*.

139 **(A)** GA effect on hypocotyl length of wild type, *lec1-4* and *pif4*. Seedlings were  
 140 grown on 1/2 MS in the light with 10  $\mu$ M GA or mock treatment for 5 days.

141 **(B)** Auxin effect on hypocotyl length of wild type, *lec1-4*, and *pif4* at high  
 142 temperature. Seedlings were grown on 1/2x MS with 0.1  $\mu$ M synthetic auxin  
 143 picloram (PIC) or mock treatment (M) at the 28  $^{\circ}$ C for 5 days.

144 **(C)** Effect of brassinosteroids on hypocotyl length of wild type, *lec1-4*, and  
 145 *bri1-301*. Seedlings were grown on 1/2x MS with 0.1  $\mu$ M exogenous  
 146 brassinolide (BL, the most active form of brassinosteroids) or mock-treated for  
 147 5 days. The *bri1-301* was used as a negative control. Data represent mean  
 148  $\pm$ SD of at least 30 seedlings. Asterisks indicate significant differences of  
 149 relative hypocotyl length calculated by comparing the values of GA, PIC, or BL  
 150 treatment to those of mock treatment between Col and mutants ( $p < 0.05$ , by  
 151 Student's *t*-test). Bar=2 mm.

152

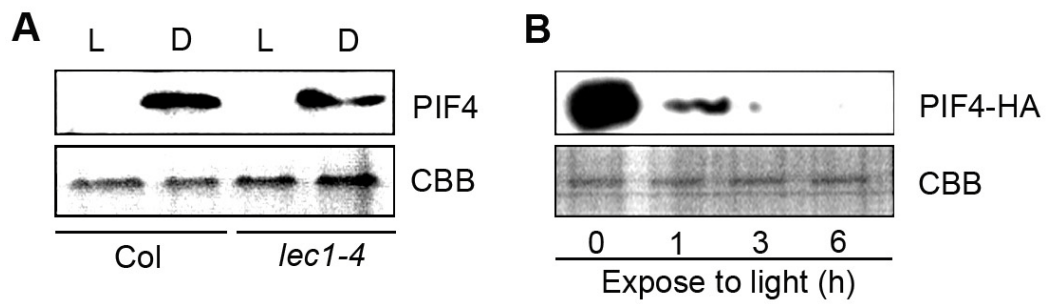

153

154

155 **Supplemental Figure 12.** Immunoblot Analysis of PIF4 Protein.

156 **(A)** Immunoblot analysis of PIF4 protein expressed in 3-day-old Col and *lec1-4*  
157 seedlings grown in the light (L) or the dark (D). Anti-PIF4 antibody (Abiocode,  
158 USA) was used to examine the PIF4 protein level.

159 **(B)** Immunoblot analysis of PIF4-HA protein expressed in 3-day-old  
160 *35S:PIF4-HA* seedlings grown in the dark and then exposed to light for  
161 indicated time. Coomassie blue staining (CBB) was used as a loading control.

162

163 **Supplemental Table 1. List of Primers Used in This Study.**

164

165 **Primers for quantitative real-time PCR**

| Gene name     | Primers (5'-3')                                      |
|---------------|------------------------------------------------------|
| <i>LEC1</i>   | F:AAACCTATGGAGGAAATGG<br>R:TAATGGAAGACGAAGAGCC       |
| <i>PIF4</i>   | F: CAACCCATCACAGAACGA<br>R: GCAACCAGAGGAGCCACC       |
| <i>IAA19</i>  | F: AAATGGAGAAGGAAGGAC<br>R: ACCACCAGATGAAACGAC       |
| <i>IAA29</i>  | F: TTGCGACAGAGAAGATAC<br>R: CAAAATAAAAAATAATGG       |
| <i>ATHB-2</i> | F: CGGAGATGCTGCGAGAAT<br>R: GTCAAAGTAGTGGGTGGG       |
| <i>YUC8</i>   | F: ACAACCCACGAAACGCTC<br>R: AAAACACGCACAACACCC       |
| <i>TUB2</i>   | F: ATCCGTGAAGAGTACCCAGAT<br>R: AAGAACCATGCACTCATCAGC |

166

167 **Primers for RT-PCR**

| Gene name   | Primers (5'-3')                                      |
|-------------|------------------------------------------------------|
| <i>LEC1</i> | F: CCAAATCCATCTCTGAAT<br>R: CATAGCCCAAAGGATATC       |
| <i>TUB2</i> | F: ATCCGTGAAGAGTACCCAGAT<br>R: TCACCTTCTTCATCCGCAGTT |

168

169 **Primers for constructs in plant transformation**

| Construct name         | Primers (5'-3')                                                                        |
|------------------------|----------------------------------------------------------------------------------------|
| <i>pLEC1:LEC1-FLAG</i> | F:AAACTGCAGGAAGTAAATTATGATGCTTGTTGCGTG<br>R:CGCGGATCCCTTATACTGACCATAATGGTCAAAAGC       |
| <i>pLEC1: GUS</i>      | F: AAACTGCAGGAAGTAAATTATGATGCTTGTTGCGTG<br>R: CGCGGATCCCTGTTTCTCTGCCGTCTTTTTTTTTTTTTTG |

170

171 **Primers for constructs in yeast two-hybrid assays**

| Construct name  | Primers (5'-3')                                                   |
|-----------------|-------------------------------------------------------------------|
| <i>BD-LEC1</i>  | F:AATTCATATGATGGAACGTGGAGCTCCCT<br>R: CGCGGATCCTCACTTATACTGACCATA |
| <i>BD-LEC1N</i> | F:AATTCATATGATGGAACGTGGAGCTCCCT<br>R:CGCGGATCCCATAGCCCAAAGGATATC  |
| <i>BD-LEC1C</i> | F:AATTCATATGAAGCTTGGGTTGATAAC<br>R:CGCGGATCCTCACTTATACTGACCATA    |
| <i>BD-L1L</i>   | F:GGAATTCATATGATGGAACGTGGAGGCTTC<br>R:CGCGGATCCTCAGTACTTATGTTGTTG |

|                  |                                                                    |
|------------------|--------------------------------------------------------------------|
| <i>AD-PIF4</i>   | F:CTCGAATTCATGGAACACCAAGGTTGG<br>R:CAGGAGCTCCTAGTGGTCCAAACGAGA     |
| <i>AD-PIF4N1</i> | F:CTCGAATTCATGGAACACCAAGGTTGG<br>R:CAGGAGCTCGTTTGATCCTGATCGTTG     |
| <i>AD-PIF4N2</i> | F:CTCGAATTCATGGAACACCAAGGTTGG<br>R:CAGGAGCTCCATCACTTGAAGCTGTAAC    |
| <i>AD-PIF4C</i>  | F:CTCGAATTCATGGGGAGTGGAAATGGCG<br>R:CAGGAGCTCCTAGTGGTCCAAACGAGA    |
| <i>AD-PIF1</i>   | F:CTCGAATTCATGCATCATTTTGTCCCTG<br>R:CAGGAGCTCTTAACCTGTTGTGTGGTT    |
| <i>AD-PIF3</i>   | F:CTCGAATTCATGCCTCTGTTTGAGCTTTTC<br>R:CAGGAGCTCTCACGACGATCCACAAAAC |
| <i>AD-PIF5</i>   | F:CTCGAATTCATGGAACAAGTGTGTTGCTG<br>R:CAGGAGCTCTCAGCCTATTTTACCCATAT |

172

173 **Primers for constructs in pull-down assays**

| Construct name  | Primers (5'-3')                                                      |
|-----------------|----------------------------------------------------------------------|
| <i>GST-PIF4</i> | F:CCGGAATTCATGGAACACCAAGGTTGGAG<br>R:CGACTCGAGCTAGTGGTCCAAACGAGAA    |
| <i>His-LEC1</i> | F:CGCGGATCCATGGAACGTGGAGCTCCCTT<br>R:ACGCGTTCGACCTTATACTGACCATAATGGT |

174

175 **Primers for ChIP assays**

| Gene name     | Primers (5'-3')                                                                                                                                                             |
|---------------|-----------------------------------------------------------------------------------------------------------------------------------------------------------------------------|
| <i>IAA19</i>  | P1 F:GATGAAAACCAAACACTGCTCC<br>P1 R:CCAAAGGCTACCAAACGAC<br>P2 F:CAAACCTGAACCCAAAACATAC<br>P2 R:CCGCTTTAATCTCACATGGAG<br>P3 F:CCCCACTTTGTCTCCCCACA<br>P3 R:CACCGCGTCGTGCTTTT |
| <i>YUC8</i>   | P1 F:CAACTCCCAATAAAAGAC<br>P1 R:TTTTCTGGTTTCCTCAAT<br>P2 F:ATTCTGCATTTGGTTCCA<br>P2 R:GGGTGATTCTTTGTGGGAC<br>P3 F:TAAGCAATCATACTCACA<br>P3 R:TTTTCCACTCGACGATAT             |
| <i>IAA29</i>  | P1 F:GCAAGACTAAGTGTAAGTGG<br>P1 R:TCGTGGCGTAATGTCGGGTC<br>P2 F:GTCAAATAGGGGAGGAGGTACT<br>P2 R:TACGGTTTGCCTATCCTGAG<br>P3 F:ATAAATAGTAGCGTGTTGG<br>P3 R:TATAGTAAAAGGAAATGGG  |
| <i>ATHB-2</i> | P1 F:ATGTCACGCGGGTAATGGT<br>P1 R:AGGGCTCGTGGCATGTTTT                                                                                                                        |

P2 F: TTAGGGAAGAACAAGAAGTA  
P2 R: GATATTATGAGCCAGTGAGA  
P3 F: AGAGTCATCAAGAAGGGTAATC  
P3 R: GCACATCCAACAATAGTAAAATC

176

177 **Primers for constructs in BiFC assays**

| Construct name                   | Primers (5'-3')                                                         |
|----------------------------------|-------------------------------------------------------------------------|
| <i>35S:LEC1-EYFP<sup>C</sup></i> | F: CCGCTCGAGGAATGGAACGTGGAGCTCCCTT<br>R: CGCGGATCCGCTTATACTGACCATAATGGT |
| <i>35S:PIF4-EYFP<sup>N</sup></i> | F: CCGCTCGAGGAATGGAACACCAAGGTTGGAG<br>R: CGCGGTACCGGTGGTCCAAACGAGAACC   |

178

179 **Primers for transient transactivation assays**

| Gene name          | Primers (5'-3')                                                                                                                                      |
|--------------------|------------------------------------------------------------------------------------------------------------------------------------------------------|
| <i>pIAA19-GUS</i>  | F: CTGCTGCAGAAGAAACATGAGACATGTCA<br>R: CTGGGATCCTTCTTGAACCTCTTTTTTCC                                                                                 |
| <i>mplAA19-GUS</i> | F1: ATTTTCATATAATTTACGgGGCCCAACTTG<br>R1: CAAGTTGGGCCcCGTGAAATTATATGAAAT<br>F2: GATATCAAATGACTCCACGgGTCGATATTG<br>R2: CAATATCGACcCGTGGAGTCATTTGATATC |

180

181 **Oligos for EMSA probes**

| Probe name             | Primers (5'-3')                                         |
|------------------------|---------------------------------------------------------|
| <i>IAA19 wt probe</i>  | gaagacttagatatcaaatgactcCACGTGtcgatattggattggttttcattgg |
| <i>IAA19 mut probe</i> | gaagacttagatatcaaatgactcCACGgGtcgatattggattggttttcattgg |

182

183 **Primers for Arabidopsis mutant genotyping**

| Mutant name                     | Primers (5'-3')                                        |
|---------------------------------|--------------------------------------------------------|
| <i>lec1-4</i>                   | P1: AGAGTAAGTTTGTGGGGTCTA<br>P2: ATCTACGGTTCATGTGATTCA |
| <i>pif4-2</i>                   | P1: TAAATCTCAACATCTCCAT<br>P2: AGAACTAATACCTCACTGC     |
| <i>T-DNA left border primer</i> | LB1.3: ATTTTGCCGATTTCCGGAAC                            |

184
